# Supplementary material
Source: Springer Nature journal article supplement (https://www.springermedizin.de/resource/supplementary/12913_2012_2186_MOESM8_ESM.pdf/9529876)

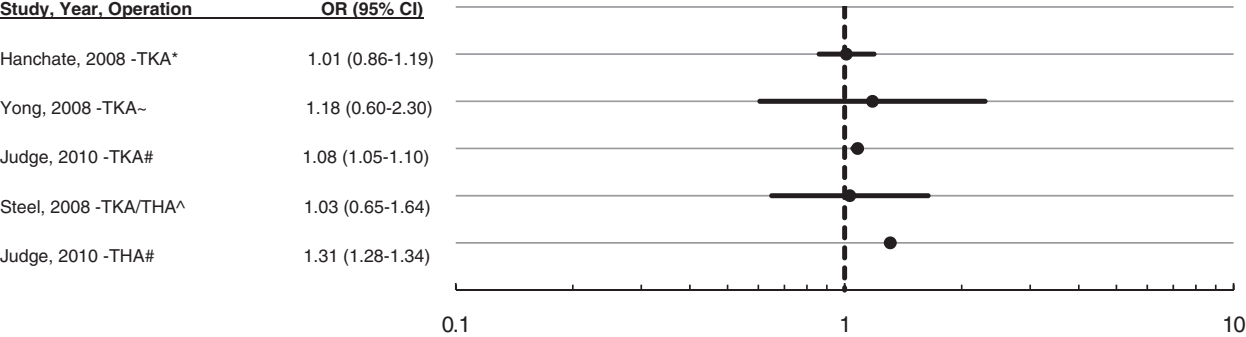

Supplement: MOESM8 [file 9529876]
